# Supplementary material for: The Trends in Opioid Use in Castile and Leon, Spain: A Population-Based Registry Analysis of Dispensations in 2015 to 2018
Source: PubMed Central journal article supplement (PMC6947376; doi:10.3390/jcm8122148), 2019-12-05
Supplement: jcm-08-02148-s001.pdf [file jcm-08-02148-s001.pdf]

**Table S1.** Opioid drugs available in Castile and León (2015 – 2018).

| Type of opioid                                            | Code ATC | Name                                                |
|-----------------------------------------------------------|----------|-----------------------------------------------------|
| Single drug +<br>N02AA55                                  | N02AA01  | Morphine                                            |
|                                                           | N02AA03  | Hydromorphone                                       |
|                                                           | N02AA05  | Oxycodone                                           |
|                                                           | N02AB02  | Pethidine                                           |
|                                                           | N02AB03  | Fentanyl                                            |
|                                                           | N02AE01  | Buprenorphine                                       |
|                                                           | N02AX02  | Tramadol                                            |
|                                                           | N02AX06  | Tapentadol                                          |
|                                                           | N02AA55  | Oxycodone and naloxone*                             |
| Opioids in<br>combination<br>with non opioid<br>analgesic | N02AJ06  | Codeine and paracetamol                             |
|                                                           | N02AJ07  | Codeine and acetylsalicylic acid                    |
|                                                           | N02AJ08  | Codeine and ibuprofen                               |
|                                                           | N02AJ13  | Tramadol and paracetamol                            |
|                                                           | N02AJ14  | Tramadol and dexketoprofen<br>(Available from 2017) |

\* Drug used in opioid detoxification. It is not considered a combination with analgesic effects.

**Table S2.** Evolution of the Castile and León population and drivers’s licence census (2015 – 2018).

| Population   |                  |                  |                  |                  |                  |                  |                  |                  |                  |                  |                  |                  |
|--------------|------------------|------------------|------------------|------------------|------------------|------------------|------------------|------------------|------------------|------------------|------------------|------------------|
| Rank age     | 2015             |                  |                  | 2016             |                  |                  | 2017             |                  |                  | 2018             |                  |                  |
|              | Male             | Female           | Total            | Male             | Female           | Total            | Male             | Female           | Total            | Male             | Female           | Total            |
| 0-4          | 45 405           | 42 504           | 87 909           | 44 382           | 41 386           | 85 768           | 42 905           | 40 144           | 83 049           | 41 604           | 39 121           | 80 725           |
| 5-9          | 50 925           | 48 078           | 99 003           | 50 665           | 47 821           | 98 486           | 50 035           | 47 344           | 97 379           | 48 594           | 45 657           | 94 251           |
| 10-14        | 49 439           | 47 220           | 96 659           | 49 847           | 47 730           | 97 577           | 50 316           | 48 259           | 98 575           | 51 124           | 48 407           | 99 531           |
| 15-19        | 48 620           | 46 904           | 95 524           | 48 862           | 46 935           | 95 797           | 48 939           | 46 706           | 95 645           | 49 610           | 47 885           | 97 495           |
| 20-24        | 54 724           | 53 382           | 108 106          | 53 230           | 52 333           | 105 563          | 52 182           | 51 246           | 103 428          | 51 428           | 50 777           | 102 205          |
| 25-29        | 62 787           | 61 247           | 124 034          | 61 109           | 59 382           | 120 491          | 59 522           | 57 531           | 117 053          | 58 298           | 56 506           | 114 804          |
| 30-34        | 75 089           | 71 664           | 146 753          | 71 742           | 68 841           | 140 583          | 68 575           | 66 051           | 134 626          | 65 942           | 63 241           | 129 183          |
| 35-39        | 90 372           | 87 031           | 177 403          | 87 267           | 83 676           | 170 943          | 83 600           | 80 400           | 164 000          | 79 663           | 76 944           | 156 607          |
| 40-44        | 92 686           | 89 879           | 182 565          | 92 967           | 90 094           | 183 061          | 92 799           | 89 681           | 182 480          | 92 434           | 89 499           | 181 933          |
| 45-49        | 93 082           | 91 643           | 184 725          | 93 035           | 91 392           | 184 427          | 92 076           | 90 588           | 182 664          | 91 744           | 89 952           | 181 696          |
| 50-54        | 93 252           | 90 618           | 183 870          | 93 251           | 91 395           | 184 646          | 93 500           | 91 893           | 185 393          | 92 913           | 92 426           | 185 339          |
| 55-59        | 87 280           | 84 212           | 171 492          | 88 988           | 85 894           | 174 882          | 89 831           | 86 956           | 176 787          | 90 852           | 87 988           | 178 840          |
| 60-64        | 72 448           | 69 337           | 141 785          | 75 073           | 72 029           | 147 102          | 77 520           | 74 875           | 152 395          | 79 640           | 77 583           | 157 223          |
| 65-69        | 65 430           | 66 777           | 132 207          | 66 403           | 67 268           | 133 671          | 67 615           | 68 053           | 135 668          | 67 660           | 67 825           | 135 485          |
| 70-74        | 56 526           | 61 968           | 118 494          | 58 076           | 63 396           | 121 472          | 58 913           | 64 067           | 122 980          | 60 320           | 64 908           | 125 228          |
| 75-79        | 45 154           | 56 939           | 102 093          | 43 540           | 53 807           | 97 347           | 43 510           | 52 990           | 96 500           | 46 205           | 55 251           | 101 456          |
| 80-84        | 44 543           | 62 354           | 106 897          | 44 319           | 62 772           | 107 091          | 42 312           | 60 175           | 102 487          | 39 465           | 56 065           | 95 530           |
| 85-89        | 27 547           | 46 335           | 73 882           | 28 618           | 47 555           | 76 173           | 29 407           | 48 337           | 77 744           | 29 731           | 48 690           | 78 421           |
| ≥ 90         | 13 282           | 30 034           | 43 316           | 14 119           | 31 809           | 45 928           | 14 662           | 32 970           | 47 632           | 15 333           | 34 407           | 49 740           |
| <b>Total</b> | <b>1 168 591</b> | <b>1 208 126</b> | <b>2 376 717</b> | <b>1 165 493</b> | <b>1 205 515</b> | <b>2 371 008</b> | <b>1 158 219</b> | <b>1 198 266</b> | <b>2 356 485</b> | <b>1 152 560</b> | <b>1 193 132</b> | <b>2 345 692</b> |

| Driver’s licence census |                |                |                  |                |                |                  |                |                |                  |                |                |                  |
|-------------------------|----------------|----------------|------------------|----------------|----------------|------------------|----------------|----------------|------------------|----------------|----------------|------------------|
| Rank age                | 2015           |                |                  | 2016           |                |                  | 2017           |                |                  | 2018           |                |                  |
|                         | Male           | Female         | Total            | Male           | Female         | Total            | Male           | Female         | Total            | Male           | Female         | Total            |
| 15-19                   | 9 282          | 5 586          | 14 868           | 9 238          | 5 634          | 14 872           | 8 357          | 4 689          | 13 046           | 8 702          | 5 102          | 13 804           |
| 20-24                   | 43 294         | 35 387         | 78 681           | 42 165         | 34 280         | 76 445           | 40 859         | 33 207         | 74 066           | 39 837         | 32 570         | 72 407           |
| 25-29                   | 55 831         | 50 618         | 106 449          | 53 617         | 48 755         | 102 372          | 51 913         | 46 861         | 98 774           | 50 269         | 45 329         | 95 598           |
| 30-34                   | 69 810         | 61 387         | 131 197          | 66 192         | 58 489         | 124 681          | 62 677         | 56 134         | 118 811          | 59 765         | 53 560         | 113 325          |
| 35-39                   | 86 841         | 75 838         | 162 679          | 83 112         | 72 880         | 155 992          | 79 204         | 70 129         | 149 333          | 74 693         | 66 771         | 141 464          |
| 40-44                   | 89 294         | 76 277         | 165 571          | 88 673         | 76 856         | 165 529          | 88 025         | 76 717         | 164 742          | 87 163         | 76 513         | 163 676          |
| 45-49                   | 90 151         | 74 310         | 164 461          | 89 641         | 74 389         | 164 030          | 88 611         | 74 242         | 162 853          | 87 961         | 74 534         | 162 495          |
| 50-54                   | 90 450         | 67 282         | 157 732          | 90 290         | 69 036         | 159 326          | 90 158         | 70 695         | 160 853          | 89 420         | 72 062         | 161 482          |
| 55-59                   | 85 820         | 56 346         | 142 166          | 87 607         | 59 781         | 147 388          | 88 543         | 62 443         | 150 986          | 89 826         | 64 796         | 154 622          |
| 60-64                   | 71 450         | 36 255         | 107 705          | 74 219         | 40 173         | 114 392          | 76 748         | 44 338         | 121 086          | 79 194         | 48 281         | 127 475          |
| 65-69                   | 62 572         | 23 964         | 86 536           | 63 824         | 26 068         | 89 892           | 65 577         | 28 466         | 94 043           | 65 978         | 30 748         | 96 726           |
| 70-74                   | 51 161         | 12 390         | 63 551           | 52 595         | 13 755         | 66 350           | 53 663         | 15 096         | 68 759           | 55 094         | 16 442         | 71 536           |
| 75-79                   | 35 993         | 5 000          | 40 993           | 34 852         | 5 277          | 40 129           | 35 960         | 6 008          | 41 968           | 38 829         | 7 105          | 45 934           |
| 80-84                   | 28 304         | 1 941          | 30 245           | 28 194         | 2 055          | 30 249           | 27 809         | 2 319          | 30 128           | 26 500         | 2 491          | 28 991           |
| 85-89                   | 14 160         | 429            | 14 589           | 14 133         | 484            | 14 617           | 14 548         | 588            | 15 136           | 14 814         | 661            | 15 475           |
| ≥ 90                    | 2 944          | 22             | 2 966            | 5 669          | 50             | 5 719            | 6 176          | 77             | 6 253            | 7 350          | 112            | 7 462            |
| <b>Total</b>            | <b>887 357</b> | <b>583 032</b> | <b>1 470 389</b> | <b>884 021</b> | <b>587 962</b> | <b>1 471 983</b> | <b>878 828</b> | <b>592 009</b> | <b>1 470 837</b> | <b>875 395</b> | <b>597 077</b> | <b>1 472 472</b> |
